# Supplementary material for: Mast cells in the development of adaptive immune responses
Source: Springer Nature journal article supplement (doi:10.1038/ni1158), 2005-01-20
Supplement: 41590_2005_BFni1158_MOESM2_ESM.pdf [file 41590_2005_BFni1158_MOESM2_ESM.pdf]

Supplemental Table 2 Potential mechanisms of mast cell activation in innate or acquired immune responses

| Mechanisms/stimuli of mast cell activation                                     | Preformed mediators | Cytokines, chemokines & growth factors |
|--------------------------------------------------------------------------------|---------------------|----------------------------------------|
| Immune receptor mediated <sup>1,2,3</sup> :                                    |                     |                                        |
| • IgE (FcεRI)                                                                  | +                   | +                                      |
| • IgG1 (FcγRIII-mouse; FcγRI-human mast cells treated with IFN-γ)              | +                   | +                                      |
| • Ig-binding superantigens:                                                    |                     |                                        |
| Endogenous (protein Fv in HBV & HCV),                                          | +                   | +                                      |
| Bacterial ( <i>S. aureus</i> Protein A, <i>P. magnus</i> Protein L)            | +                   | ?                                      |
| Viral (HIV gp120)                                                              | +                   | +                                      |
| Complement receptor mediated <sup>1,2</sup> :                                  |                     |                                        |
| • Products of complement activation (C3a/C3aR, C5a/C5aR, C3b/CR3, C4b/CR4)     | +                   | ?                                      |
| Toll like receptor mediated <sup>1,4,5</sup> :                                 |                     |                                        |
| • Peptidoglycan (TLR2)                                                         | ±                   | +                                      |
| • ds viral RNA, poly (I:C) (TLR3)                                              | -                   | +                                      |
| • LPS (TLR4/CD14)                                                              | -                   | +                                      |
| • Flagellin (TLR5)                                                             | -                   | +                                      |
| • ss viral RNA (TLR7)                                                          | -                   | +                                      |
| • CpG-DNA (TLR9)                                                               | -                   | +                                      |
| Pathogens and their products <sup>1,2</sup> :                                  |                     |                                        |
| <i>Bacteria</i>                                                                |                     |                                        |
| • CD48 coreceptor: <i>E. coli</i> FimH                                         | +                   | +                                      |
| • Toxins: <i>C. difficile</i> toxin A                                          | -                   | +                                      |
| <i>Cholera</i> toxin                                                           | -                   | +                                      |
| <i>VacA</i> (cytotoxin of <i>H. pylori</i> )                                   | -                   | +                                      |
| • Hemolysins                                                                   | +                   | ?                                      |
| • <i>Pseudomonas aeruginosa</i>                                                | low                 | +                                      |
| <i>Viruses</i> :                                                               |                     |                                        |
| • Influenza virus, respiratory syncytial virus, type I reovirus,               | -                   | +                                      |
| • Dengue virus                                                                 | -                   | +                                      |
| • Sendai virus                                                                 | +                   | ?                                      |
| <i>Parasites</i> :                                                             |                     |                                        |
| • <i>Schistosoma mansoni</i>                                                   | +                   | ?                                      |
| • <i>Leishmania major</i>                                                      | +                   | +                                      |
| Endogenous peptides, cytokines & inflammatory mediators <sup>2,6,7,8,9</sup> : |                     |                                        |
| • Neuropeptides (e.g., Substance P, neurotensin, etc.)                         |                     |                                        |
| • β-defensin 2                                                                 | +                   | +                                      |
| • LL-37                                                                        | +                   | ?                                      |
| • Endothelin-1                                                                 | +                   | ?                                      |
| • SCF                                                                          | +                   | ?                                      |
| • IL-12                                                                        | ±                   | +                                      |
| • TNF                                                                          | -                   | +                                      |
| • IL-1                                                                         | +                   | ?                                      |
| • PGE2                                                                         | -                   | +                                      |
| Venom components <sup>10,11,12</sup>                                           |                     |                                        |
| • Phospholipase A2                                                             | +                   | +                                      |
| • Mastoparan (from wasp venom)                                                 | +                   | ?                                      |

Note: In general, stimulation of mast cells via immune receptors also results in the release of lipid-derived mediators; for most of the other stimuli, the ability to induce the secretion of lipid-derived mediators has not been investigated. Not all mast cell populations respond to each of the stimuli listed, and the responsiveness of at least some mast cell populations to some of these stimuli can be modulated by systemic or local factors affecting mast cell phenotype. In some cases, the responses listed have been reported only in studies of *in vitro*-derived mast cells and/or only in mast cells from a single species. + : the response has been reported (however, the amounts of such products released can vary greatly depending on the type of mast cell and type of stimulus); - : the response was not detectable ± : minimal response and/or equivocal findings; ? : not examined or reported.

1. Marshall JS. Mast-cell responses to pathogens. *Nat Rev Immunol* 2004; 4:787-99.
2. Galli SJ, Maurer M, Lantz CS. Mast cells as sentinels of innate immunity. *Curr Opin Immunol* 1999; 11:53-9.
3. Marone G, Galli SJ, Kitamura Y. Probing the roles of mast cells and basophils in natural and acquired immunity, physiology and disease. *Trends Immunol* 2002; 23:425-7.
4. Kulka M, Alexopoulou L, Flavell RA, Metcalfe DD. Activation of mast cells by double-stranded RNA: evidence for activation through Toll-like receptor 3. *J Allergy Clin Immunol* 2004; 114:174-82.
5. Matsushima H, Yamada N, Matsue H, Shimada S. TLR3-, TLR7-, and TLR9-mediated production of proinflammatory cytokines and chemokines from murine connective tissue type skin-derived mast cells but not from bone marrow-derived mast cells. *J Immunol* 2004; 173:531-41.
6. Matsushima H, Yamada N, Matsue H, Shimada S. The effects of endothelin-1 on degranulation, cytokine, and growth factor production by skin-derived mast cells. *Eur J Immunol* 2004; 34:1910-9.
7. Niyonsaba F, Someya A, Hirata M, Ogawa H, Nagaoka I. Evaluation of the effects of peptide antibiotics human beta-defensins-1/2 and LL-37 on histamine release and prostaglandin D(2) production from mast cells. *Eur J Immunol* 2001; 31:1066-75.
8. Kandere-Grzybowska K, Letourneau R, Kempuraj D, Donelan J, Poplawski S, Boucher W, et al. IL-1 induces vesicular secretion of IL-6 without degranulation from human mast cells. *J Immunol* 2003; 171:4830-6.
9. Abdel-Majid RM, Marshall JS. Prostaglandin E2 induces degranulation-independent production of vascular endothelial growth factor by human mast cells. *J Immunol* 2004; 172:1227-36.
10. Varsani M, Pearce FL. Role of phospholipase A2 in mast cell activation. *Inflamm Res* 1997; 46 Suppl 1:S9-10.
11. Dudler T, Machado DC, Kolbe L, Annand RR, Rhodes N, Gelb MH, et al. A link between catalytic activity, IgE-independent mast cell activation, and allergenicity of bee venom phospholipase A2. *J Immunol* 1995; 155:2605-13.
12. Kruger PG, Mahata SK, Helle KB. Catestatin (CgA344-364) stimulates rat mast cell release of histamine in a manner comparable to mastoparan and other cationic charged neuropeptides. *Regul Pept* 2003; 114:29-35.
